# Supplementary material
Source: publisher figshare collection journal article supplement (https://acs.figshare.com/ndownloader/files/4280430)
Supplement: Supplementary file 1 [file 4280430]

## Supporting Information

### Metallohosts with a Heart of Carbon

*Edwin C. Constable,\* Guoqi Zhang, Daniel Häussinger, Catherine E. Housecroft\* and Jennifer A. Zampese*

*Department of Chemistry, University of Basel, Spitalstrasse 51, CH-4056 Basel, Switzerland*

#### General experimental

$^1\text{H}$  and  $^{13}\text{C}$  NMR spectra were recorded on Bruker AvanceIII 600 with BBFO+SP probehead, DRX-500 and DRX-400 NMR spectrometers; chemical shifts are referenced to residual solvent peaks (TMS =  $\delta$  0 ppm). Absorption spectra were recorded on a Varian-Cary 5000 spectrophotometer. A Shimadzu FTIR-8400S spectrophotometer was used to record IR spectra with solid samples using a Golden Gate diamond ATR accessory. Biosystems Voyager DE PRO and Bruker esquire 3000plus mass spectrometers were used to record the MALDI-TOF and ESI mass spectra.

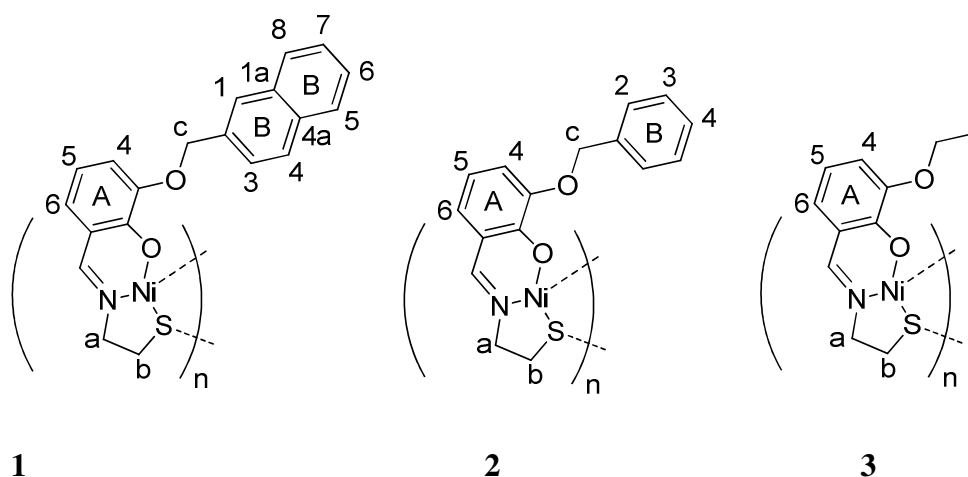

Scheme S1: Atom numbering for NMR spectroscopic assignments in compounds **1-3**.

## Experimental section

### 2-Hydroxy-3-(naphthalen-2-ylmethoxy)benzaldehyde

A solution of 2,3-dihydroxybenzaldehyde (1.93 g, 0.014 mol) in DMSO (7 cm<sup>3</sup>) was added to a suspension of NaH (1.39 g, 0.035 mol, 60% in mineral oil) in DMSO (15 cm<sup>3</sup>) at room temperature under N<sub>2</sub>. The mixture was stirred for 1 h and then a solution of 2-(bromomethyl)naphthalene (3.08 g, 0.014 mol) in DMSO (5 cm<sup>3</sup>) was added. The reaction mixture was stirred at room temperature for 40 h, and was then poured into distilled water (80 cm<sup>3</sup>) and extracted with CHCl<sub>3</sub> (2 × 20 cm<sup>3</sup>). The aqueous layer was acidified with 6 M HCl to adjust the pH to ≈4 and was again extracted with CHCl<sub>3</sub> (3 × 40 cm<sup>3</sup>). The combined CHCl<sub>3</sub> extracts were washed with 1 M HCl (2 × 40 cm<sup>3</sup>), and dried over Na<sub>2</sub>SO<sub>4</sub>, filtered and concentrated to give brown solid, which was purified by flash column chromatography on silica gel (n-hexanes/ethyl acetate, 19:1, v/v). 2-Hydroxy-3-(naphthalen-2-ylmethoxy)benzaldehyde was isolated as a pale-yellow solid (1.56 mg, 40.0%). M.p.: 113-114°C. <sup>1</sup>H NMR (500 MHz, CDCl<sub>3</sub>) δ / ppm 11.13 (s, 1H, H<sup>CH=O</sup>), 9.90 (s, 1H, H<sup>OH</sup>), 7.87 (s, 1H, H<sup>B1</sup>), 7.85 (d, *J* = 8.5 Hz, 1H, H<sup>B4</sup>), 7.82 (m, overlapping, 2H, H<sup>B5+B8</sup>), 7.55 (dd, 1H, *J* = 8.4, 1.2 Hz, 1H, H<sup>B3</sup>), 7.47 (m, overlapping, 2H, H<sup>B6+B7</sup>), 7.16 (m, 2H, H<sup>A6+A4</sup>), 6.86 (t, *J* =

7.9 Hz, 1H, H<sup>A5</sup>), 5.35 (s, 2H, H<sup>c</sup>). <sup>13</sup>C NMR (126 MHz, CDCl<sub>3</sub>)  $\delta$  / ppm 196.8 (C<sup>CH=O</sup>), 152.6 (C<sup>A2</sup>), 147.4 (C<sup>A3</sup>), 134.2 (C<sup>B2</sup>), 133.5 (C<sup>B1a/B4a</sup>), 133.3 (C<sup>B1a/B4a</sup>), 128.7 (C<sup>B4</sup>), 128.2 (C<sup>B5/B8</sup>), 128.0 (C<sup>B5/B8</sup>), 126.5 (C<sup>B1</sup>), 126.5 (C<sup>B6/B7</sup>), 126.4 (C<sup>B6/B7</sup>), 125.6 (C<sup>A6</sup>), 125.3 (C<sup>B3</sup>), 121.4 (C<sup>A4</sup>), 121.3 (C<sup>A1</sup>), 119.7 (C<sup>A5</sup>), 71.8 (C<sup>c</sup>). UV/VIS  $\lambda_{\text{max}}$ /nm (1.0  $\times$  10<sup>-5</sup> mol dm<sup>-3</sup>, CH<sub>2</sub>Cl<sub>2</sub>) 229 ( $\epsilon$  / 10<sup>3</sup> dm<sup>3</sup> mol<sup>-1</sup> cm<sup>-1</sup> 94.0), 267 (19.0), 350 (3.50). IR (solid, cm<sup>-1</sup>): 2832w, 1659s, 1580w, 1457s, 1388m, 1375m, 1308w, 1270m, 1244s, 1217s, 1165m, 1124w, 1092w, 1056m, 965s, 950m, 894w, 866s, 846w, 824s, 791s, 756s, 731s, 716s, 653s. ESI-MS (MeOH)  $m/z$  579.1 [2M + Na]<sup>+</sup> (calc. 579.2), 301.1 [M + Na]<sup>+</sup> (base peak, calc. 301.1). Elemental analysis calcd. (%) for C<sub>18</sub>H<sub>14</sub>O<sub>3</sub>: C 77.68, H 5.07; found C 77.29, H 5.00.

**1·CH<sub>2</sub>Cl<sub>2</sub>**: 2-Hydroxy-3-(naphthalen-2-ylmethoxy)benzaldehyde (139 mg, 0.50 mmol) and 2-aminoethanethiol (38.5 mg, 0.50 mmol) were dissolved in CH<sub>2</sub>Cl<sub>2</sub>/CH<sub>3</sub>OH (14 cm<sup>3</sup>, v/v, 1:6). Solid NiCl<sub>2</sub>·6H<sub>2</sub>O (118 mg, 0.50 mmol) was added while the mixture was stirred at room temperature. Et<sub>3</sub>N (50.1 mg, 0.50 mmol) was added dropwise. The resulting suspension was stirred for 1 hour, then filtered. The pale-brown solid was washed with MeOH and dried in the air. Yield: 90.0 mg, 45.8%. <sup>1</sup>H NMR (500 MHz, CDCl<sub>3</sub>)  $\delta$  / ppm 7.83 (m, 12H, H<sup>B5+B8+B4+B1</sup>), 7.53 (m, 6H, H<sup>B6+B7</sup>), 7.45 (d,  $J$  = 8.1 Hz, 3H, H<sup>B3</sup>), 6.74 (br, 3H, H<sup>A4</sup>), 6.48 (s, 3H, H<sup>CH=N</sup>), 6.42 (br, 6H, H<sup>A5+A6</sup>), 4.96 (s, 6H, H<sup>c</sup>), 2.84 (br, 6H, H<sup>a</sup>), 1.34 (br, 6H, H<sup>b</sup>). <sup>13</sup>C NMR (126 MHz, CDCl<sub>3</sub>)  $\delta$  / ppm 159.6 (C<sup>CH=N</sup>), 154.4 (C<sup>A2</sup>), 150.7 (C<sup>A3</sup>), 134.8 (C<sup>B2</sup>), 133.3 (C<sup>B1a/B4a</sup>), 133.2 (C<sup>B1a/B4a</sup>), 128.26 (C<sup>B1</sup>), 128.17 (C<sup>B5/B8</sup>), 128.14 (C<sup>B5/B8</sup>), 127.95 (C<sup>B4</sup>), 127.2 (C<sup>B3</sup>), 126.62 (C<sup>B6/B7</sup>), 126.56 (C<sup>B6/B7</sup>), 124.3 (C<sup>A6</sup>), 119.8 (C<sup>A1</sup>), 113.7 (C<sup>A5</sup>), 113.3 (C<sup>A4</sup>), 70.9 (C<sup>c</sup>), 70.0 (C<sup>a</sup>), 24.5 (C<sup>b</sup>). <sup>1</sup>H NMR (600 MHz, 1,2-C<sub>6</sub>D<sub>4</sub>Cl<sub>2</sub>)  $\delta$  / ppm 7.77 (m, 12H, H<sup>B5+B8</sup>), 7.74 (d,  $J$  = 8.4 Hz, 3H, H<sup>B4</sup>), 7.67 (s, 3H, H<sup>B1</sup>), 7.46 (m, 3H, H<sup>B6+B7</sup>), 7.37 (d,  $J$  = 8.0 Hz, 3H, H<sup>B3</sup>), 6.71 (d,  $J$  = 7.0 Hz, 3H, H<sup>A4</sup>), 6.48 (t,  $J$  = 7.6 Hz, 3H, H<sup>A5</sup>), 6.43 (d,  $J$  = 7.6 Hz, 3H, H<sup>A6</sup>), 6.29 (s, 3H, H<sup>CH=N</sup>), 4.81 (s, 6H, H<sup>c</sup>), 2.65 (br, 6H, H<sup>a</sup>), 1.28 (m, 6H, H<sup>b</sup>). <sup>13</sup>C

NMR (151 MHz, 1,2- $C_6D_4Cl_2$ )  $\delta$ / ppm 159.3 ( $C^{CH=N}$ ), 154.3 ( $C^{A2}$ ), 150.7 ( $C^{A3}$ ), 134.7 ( $C^{B2}$ ), 133.4 ( $C^{B1a}$ ), 133.3 ( $C^{B4a}$ ), 128.5 ( $C^{B1}$ ), 128.2 ( $C^{B4}$ ), 128.1 ( $C^{B8}$ ), 127.9 ( $C^{B5}$ ), 126.52 ( $C^{B7}$ ), 126.47 ( $C^{B6}$ ), 126.3 ( $C^{B3}$ ), 124.2 ( $C^{A6}$ ), 119.7 ( $C^{A1}$ ), 113.9 ( $C^{A5}$ ), 112.8 ( $C^{A4}$ ), 70.6 ( $C^c$ ), 70.2 ( $C^a$ ), 24.3 ( $C^b$ ). UV/VIS  $\lambda_{max}/nm$  ( $1.0 \times 10^{-5}$  mol  $dm^{-3}$ ,  $CH_2Cl_2$ ) 230 ( $\epsilon / 10^3$   $dm^3$   $mol^{-1}$   $cm^{-1}$  188), 268 (74.6), 379 (14.1), 513sh (1.30), 616 (0.400). IR (solid,  $cm^{-1}$ ): 1652m, 1609s, 1557w, 1539w, 1507w, 1465s, 1446s, 1326m, 1228s, 1208s, 1171m, 1073w, 949w, 854m, 809m, 738s, 668s. MALDI-TOF MS (NOBA):  $m/z$  1181.1  $[M]^+$  (calc. 1181.1), 788.4  $[Ni_2L_2]$  (base peak, calc. 788.1). Elemental analysis calcd. (%) for  $C_{60}H_{51}N_3Ni_3O_6S_3 \cdot CH_2Cl_2$ : C 57.81, H 4.22, N 3.32; found C 58.04, H 4.20, N 3.40.

**2**· $CH_2Cl_2$ : The procedure was as for **1**, but using 3-(benzyloxy)-2-hydroxybenzaldehyde (228 mg, 1.00 mmol), 2-aminoethanethiol (77.0 mg, 1.00 mmol) and  $NiCl_2 \cdot 6H_2O$  (236 mg, 1.00 mmol). Brown crystals of **2**· $CH_2Cl_2$  were isolated after 5 days. Yield: 170 mg, 45.7%. Compound **2** (dissolved crystalline **2**· $CH_2Cl_2$ ):  $^1H$  NMR (500 MHz,  $CDCl_3$ )  $\delta$  / ppm major component: 7.35 (m, overlapping with minor component, 5H,  $H^B$ ), 7.12 (s, 1H,  $H^{N=CH}$ ), 6.72 (d,  $J = 7.4$  Hz, 1H,  $H^{A4}$ ), 6.68 (d,  $J = 7.9$  Hz, 1H,  $H^{A6}$ ), 6.43 (t,  $J = 7.6$  Hz, 1H,  $H^{A5}$ ), 4.82 (s, overlapping with minor component, 2H,  $H^c$ ), 3.12 (br, 2H,  $H^a$ ), 1.45 (br, overlapping with minor component, 2H,  $H^b$ ); minor component: 7.66 (s, 1H,  $H^{N=CH}$ ), 7.35 (m, overlapping with major component, 5H,  $H^B$ ), 6.83 (d,  $J = 7.6$  Hz, 2H,  $H^{A4+A6}$ ), 6.48 (t,  $J = 7.5$  Hz, 1H,  $H^{A5}$ ), 4.82 (s, overlapping with major component, 2H,  $H^c$ ), 3.36 (m, 2H,  $H^{a1+a2}$ ), 2.57 (m, 1H,  $H^{b1/b2}$ ), 1.45 (br, overlapping with major component, 1H,  $H^{b1/b2}$ );  $^{13}C$  NMR (126 MHz,  $CDCl_3$ )  $\delta$  / ppm major component: 159.7 ( $C^{N=CH}$ ), 154.4 ( $C^{A2}$ ), 150.5 ( $C^{A3}$ ), 137.3 ( $C^{B1}$ ), 129.2 ( $C^{B2}$ ), 128.6 ( $C^{B3}$ ), 128.4 ( $C^{B4}$ ), 124.2 ( $C^{A6}$ ), 119.8 ( $C^{A1}$ ), 113.8 ( $C^{A5}$ ), 113.4 ( $C^{A4}$ ), 70.7 ( $C^c$ ), 70.4 ( $C^a$ ), 24.7 ( $C^b$ ); minor component: 160.7 ( $C^{N=CH}$ ), 155.4 ( $C^{A2}$ ), 150.2 ( $C^{A3}$ ), 137.3 ( $C^{B1}$ ), 129.2 ( $C^{B2}$ ), 128.6 ( $C^{B3}$ ), 128.4 ( $C^{B4}$ ), 125.8 ( $C^{A6}$ ), 119.5 ( $C^{A1}$ ), 117.5 ( $C^{A4}$ ), 113.9

(C<sup>A5</sup>), 70.7 (C<sup>c</sup>), 69.0 (C<sup>a</sup>), 27.4 (C<sup>b</sup>). UV/VIS  $\lambda_{\text{max}}/\text{nm}$  ( $1.0 \times 10^{-5}$  mol dm<sup>-3</sup>, C<sub>6</sub>H<sub>5</sub>Cl) 291sh ( $\epsilon / 10^3$  dm<sup>3</sup> mol<sup>-1</sup> cm<sup>-1</sup> 38.8), 345sh (16.7), 378 (16.2), 515 (2.25), 623sh (0.48). IR (solid, cm<sup>-1</sup>): 2912w, 1603s, 1539m, 1464s, 1447s, 1393w, 1331s, 1242s, 1226s, 1173m, 1106w, 1070m, 996m, 959w, 945w, 864w, 848s, 729s. MALDI-TOF MS (NOBA): 1034.0 [M + H]<sup>+</sup> (calc. 1032.1), 688.8 [Ni<sub>2</sub>L<sub>2</sub> + H]<sup>+</sup> (base peak, calc. 687.0). ESI-MS (CH<sub>2</sub>Cl<sub>2</sub>/MeOH):  $m/z$  1397.3 [Ni<sub>4</sub>L<sub>4</sub> + Na]<sup>+</sup> (calc. 1397.1), 1054.3 [M + Na]<sup>+</sup> (calc. 1054.0), 1031.3 [M + H]<sup>+</sup> (calc. 1032.1), 709.3 [Ni<sub>2</sub>L<sub>2</sub> + Na]<sup>+</sup> (base peak, calc. 709.0). Elemental analysis calcd. (%) for C<sub>48</sub>H<sub>45</sub>N<sub>3</sub>Ni<sub>3</sub>O<sub>16</sub>S<sub>3</sub>·CH<sub>2</sub>Cl<sub>2</sub>: C 52.68, H 4.24, N 3.76; found C 52.93, H 4.04, N 4.00%.

**2(3)·CH<sub>2</sub>Cl<sub>2</sub>**: The procedure was as for **1**, but using 3-ethoxy-2-hydroxybenzaldehyde (166 mg, 1.00 mmol), 2-aminoethanethiol (77.0 mg, 1.00 mmol) and NiCl<sub>2</sub>·6H<sub>2</sub>O (236 mg, 1.00 mmol). Slow evaporation of the filtrate at room temperature over 1 week resulted in the formation of brown block-like crystals which were separated by filtration, washed with MeOH and dried in air. Yield: 130 mg, 44.3%. Compound **3** (dissolved crystalline 2(3)·CH<sub>2</sub>Cl<sub>2</sub>): <sup>1</sup>H NMR (500 MHz, CDCl<sub>3</sub>)  $\delta$  / ppm major component: 7.62 (s, 1H, H<sup>N=CH</sup>), 6.72 (dd,  $J$  = 8.0, 1.4 Hz, 1H, H<sup>A6</sup>), 6.64 (dd,  $J$  = 7.6, 1.3 Hz, 1H, H<sup>A4</sup>), 6.43 (t,  $J$  = 7.8 Hz, 1H, H<sup>A5</sup>), 3.88 (overlapping m, 4H, H<sup>CH<sub>2</sub>(Et)+a</sup>), 1.85 (br, 2H, H<sup>b</sup>), 1.35 (t,  $J$  = 6.9 Hz, 3H, H<sup>CH<sub>3</sub>(Et)</sup>); minor component: 7.67 (s, 1H, H<sup>N=CH</sup>), 6.79 (dd,  $J$  = 8.0, 1.4 Hz, 1H, H<sup>A6</sup>), 6.75 (dd,  $J$  = 7.6, 1.4 Hz, 1H, H<sup>A4</sup>), 6.47 (t,  $J$  = 7.8 Hz, 1H, H<sup>A5</sup>), 3.95 (m, 2H, H<sup>CH<sub>2</sub>(Et)</sup>), 3.76 (m, 2H, H<sup>a1+a2</sup>), 2.64 (m, 1H, H<sup>b1/b2</sup>), 1.69 (m, 1H, H<sup>b1/b2</sup>), 1.34 (t,  $J$  = 6.9 Hz, 3H, H<sup>CH<sub>3</sub>(Et)</sup>). <sup>13</sup>C NMR (126 MHz, CDCl<sub>3</sub>)  $\delta$  / ppm major component: 160.1 (C<sup>N=CH</sup>), 154.3 (C<sup>A2</sup>), 150.6 (C<sup>A3</sup>), 123.9 (C<sup>A6</sup>), 119.5 (C<sup>A1</sup>), 114.0 (C<sup>A5</sup>), 113.2 (C<sup>A4</sup>), 68.9 (C<sup>a</sup>), 63.5 (C<sup>CH<sub>2</sub>(Et)</sup>), 24.9 (C<sup>b</sup>), 15.3 (C<sup>CH<sub>3</sub>(Et)</sup>); minor component: 160.6 (C<sup>N=CH</sup>), 155.4 (C<sup>A2</sup>), 150.8 (C<sup>A3</sup>), 124.8 (C<sup>A6</sup>), 119.5 (C<sup>A1</sup>), 115.6 (C<sup>A4</sup>), 114.3 (C<sup>A5</sup>), 70.6 (C<sup>a</sup>), 64.0 (C<sup>CH<sub>2</sub>(Et)</sup>), 26.7 (C<sup>b</sup>), 15.3 (C<sup>CH<sub>3</sub>(Et)</sup>). UV/VIS  $\lambda_{\text{max}}/\text{nm}$  ( $1.0 \times 10^{-5}$  mol dm<sup>-3</sup>, C<sub>6</sub>H<sub>5</sub>Cl) 291sh ( $\epsilon/10^3$  dm<sup>3</sup> mol<sup>-1</sup> cm<sup>-1</sup> 43.9), 343sh (18.7), 381

(21.8), 416 (19.5), 514 (3.31), 624sh (0.893). IR (solid,  $\text{cm}^{-1}$ ): 2970w, 2909w, 1606s, 1540m, 1464s, 1449s, 1436m, 1391w, 1330s, 1242s, 1228s, 1175w, 1115w, 1077m, 1024w, 948s, 842m, 728s. MALDI-TOF MS (NOBA): 845.1  $[\text{M} + \text{H}]^+$  (calc. 846.0), 562.5  $[\text{Ni}_2\text{L}_2 + \text{H}]^+$  (base peak, calc. 563.0). ESI-MS ( $\text{CH}_2\text{Cl}_2$ ) 1149.2  $[\text{Ni}_4\text{L}_4 + \text{Na}]^+$  (calc. 1149.0), 1126.2  $[\text{Ni}_4\text{L}_4 + \text{H}]^+$  (calc. 1127.0), 868.4  $[\text{M} + \text{Na}]^+$  (calc. 868.0), 845.2  $[\text{M} + \text{H}]^+$  (calc. 846.0), 585.1  $[\text{Ni}_2\text{L}_2 + \text{Na}]^+$  (base peak, calc. 585.0), 564.1  $[\text{Ni}_2\text{L}_2 + \text{H}]^+$  (calc. 563.0). Elemental analysis calcd. (%) for  $\text{C}_{33}\text{H}_{39}\text{N}_3\text{Ni}_3\text{O}_6\text{S}_3 \cdot 0.5\text{CH}_2\text{Cl}_2$ : C 45.29, H 4.54, N 4.73; found C 45.33, H 4.41, N 4.82%.

**$1 \cdot \text{C}_{60} \cdot 0.5(1,2\text{-Cl}_2\text{C}_6\text{H}_4) \cdot \text{Et}_2\text{O}$** : Crystalline  $2(1) \cdot \text{CH}_2\text{Cl}_2$  (12.6 mg, 10.0  $\mu\text{mol}$ ) was dissolved in 1,2- $\text{Cl}_2\text{C}_6\text{H}_4/\text{CH}_2\text{Cl}_2$  (2.0  $\text{cm}^3$ , 4:1, v/v), and  $\text{C}_{60}$  (7.20 mg, 10.0  $\mu\text{mol}$ ) was added to the solution. The solid dissolved after sonication in an ultrasonic bath for 5 min. The reaction mixture was filtered, and  $\text{Et}_2\text{O}$  was allowed to diffuse into the filtrate. Over three days black plates of  $1 \cdot \text{C}_{60} \cdot 0.5(1,2\text{-Cl}_2\text{C}_6\text{H}_4) \cdot \text{Et}_2\text{O}$  were obtained (13.2 mg, 69.5%). IR (solid,  $\text{cm}^{-1}$ ): 1605s, 1541m, 1463s, 1447s, 1328s, 1273w, 1240m, 1226s, 1178w, 1107w, 1073m, 991w, 950w, 900w, 867w, 818m, 795m, 732s. Elemental analysis calcd. (%) for  $\text{C}_{120}\text{H}_{51}\text{N}_3\text{Ni}_3\text{O}_6\text{S}_3 \cdot 0.2(1,2\text{-Cl}_2\text{C}_6\text{H}_4)$ : C 75.33, H 2.70, N 2.17; found C 75.67, H 2.57, N 1.98.

**$2(2) \cdot \text{C}_{60} \cdot 1,2\text{-Cl}_2\text{C}_6\text{H}_4 \cdot 0.25\text{H}_2\text{O}$** : The method was as above, starting with crystalline  $2 \cdot \text{CH}_2\text{Cl}_2$  (10.3 mg, 9.22  $\mu\text{mol}$ ). The product was isolated as black plates (7.60 mg, 60.0%). IR (solid,  $\text{cm}^{-1}$ ): 2907w, 1609s, 1839m, 1464s, 1447s, 1387m, 1331s, 1270w, 1246s, 1228s, 1205w, 1174m, 1116w, 1080m, 1069m, 1027w, 995m, 945m, 898w, 868w, 845s, 738s, 729s. Elemental analysis calcd. (%) for  $\text{C}_{156}\text{H}_{90}\text{N}_6\text{Ni}_6\text{O}_{12}\text{S}_6 \cdot \text{C}_6\text{H}_4\text{Cl}_2 \cdot 0.25\text{H}_2\text{O}$ : C 66.26, H 3.24, N 2.86; found C 66.15, H 3.13, N 2.65%.

**2(3)·C<sub>60</sub>·CH<sub>2</sub>Cl<sub>2</sub>**: The method was as above, starting with crystalline 2(3)·CH<sub>2</sub>Cl<sub>2</sub> (8.85 mg, 5.00 μmol). The product was isolated as black blocks (8.90 mg, 71.5%). IR (solid, cm<sup>-1</sup>): 3060w, 2908w, 2866w, 1608s, 1540m, 1463s, 1450s, 1330s, 1275w, 1243s, 1227s, 1182m, 1173m, 1107w, 1072m, 1032w, 993m, 864s, 840s, 737s, 728s. Elemental analysis calcd. (%) for C<sub>66</sub>H<sub>78</sub>N<sub>6</sub>Ni<sub>6</sub>O<sub>12</sub>S<sub>6</sub>·C<sub>60</sub>·CH<sub>2</sub>Cl<sub>2</sub>: C 61.08, H 3.23, N 3.36; found C 61.32, H 3.13, N 3.24%.

## Crystallography

Data were collected on a Stoe IPDS or Bruker-Nonius KappaAPEX diffractometer. The data reduction, solution and refinement used Stoe IPDS<sup>1</sup> or Bruker<sup>2</sup> software, and SHELXL97.<sup>3</sup> ORTEP figures were drawn using Ortep-3 for Windows.<sup>4</sup> Structures were analysed using Mercury v. 2.3.<sup>5,6</sup>

**2(1)·CH<sub>2</sub>Cl<sub>2</sub>**: C<sub>121</sub>H<sub>104</sub>Cl<sub>2</sub>N<sub>6</sub>Ni<sub>6</sub>O<sub>12</sub>S<sub>6</sub>, *M* = 2449.62, black block, rhombohedral, space group *R*-3, *a* = *b* = 20.479(3), *c* = 21.481(4) Å, *U* = 7802(2) Å<sup>3</sup>, *Z* = 3, *D<sub>c</sub>* = 1.564 Mg m<sup>-3</sup>, μ(Mo-K<sub>α</sub>) = 1.305 mm<sup>-1</sup>, *T* = 173 K. Total 39038 reflections, 3078 unique, *R*<sub>int</sub> = 0.1443. Refinement of 2696 reflections (259 parameters) with *I* > 2σ(*I*) converged at final *R*1 = 0.0492 (*R*1 all data = 0.0579), *wR*2 = 0.1090 (*wR*2 all data = 0.1129), *gof* = 1.156.

**2·CH<sub>2</sub>Cl<sub>2</sub>**: C<sub>49</sub>H<sub>47</sub>Cl<sub>2</sub>N<sub>3</sub>Ni<sub>3</sub>O<sub>6</sub>S<sub>3</sub>, *M* = 1117.08, black plate, monoclinic, space group *P*2<sub>1</sub>/*c*, *a* = 15.661(3), *b* = 18.078(3), *c* = 18.236(3) Å, β = 115.008(12)°, *U* = 4678.9(15) Å<sup>3</sup>, *Z* = 4, *D<sub>c</sub>* = 1.586 Mg m<sup>-3</sup>, μ(Mo-K<sub>α</sub>) = 1.497 mm<sup>-1</sup>, *T* = 173 K. Total 86319 reflections, 10736 unique, *R*<sub>int</sub> = 0.0707. Refinement of 10007 reflections (595 parameters) with *I* > 2σ(*I*) converged at final *R*1 = 0.0344 (*R*1 all data = 0.0375), *wR*2 = 0.0855 (*wR*2 all data = 0.0873), *gof* = 1.117.

**2(3)·CH<sub>2</sub>Cl<sub>2</sub>:** C<sub>67</sub>H<sub>80</sub>Cl<sub>2</sub>N<sub>6</sub>Ni<sub>6</sub>O<sub>12</sub>S<sub>6</sub>,  $M = 1776.83$ , brown prism, monoclinic, space group  $P2_1/c$ ,  $a = 17.1563(10)$ ,  $b = 16.5850(8)$ ,  $c = 24.7229(14)$  Å,  $\beta = 90.326(3)^\circ$ ,  $U = 7034.5(7)$  Å<sup>3</sup>,  $Z = 4$ ,  $D_c = 1.678$  Mg m<sup>-3</sup>,  $\mu(\text{Mo-K}\alpha) = 1.893$  mm<sup>-1</sup>,  $T = 123$  K. Total 87397 reflections, 16154 unique,  $R_{\text{int}} = 0.0425$ . Refinement of 12111 reflections (908 parameters) with  $I > 2\sigma(I)$  converged at final  $R1 = 0.0352$  ( $R1$  all data = 0.0650),  $wR2 = 0.1043$  ( $wR2$  all data = 0.1474),  $\text{gof} = 1.142$ .

**1·C<sub>60</sub>·0.5(1,2-Cl<sub>2</sub>C<sub>6</sub>H<sub>4</sub>)·Et<sub>2</sub>O:** C<sub>127</sub>H<sub>63</sub>ClN<sub>3</sub>Ni<sub>3</sub>O<sub>7</sub>S<sub>3</sub>,  $M = 2050.54$ , black plate, monoclinic, space group  $C2/c$ ,  $a = 46.302(6)$ ,  $b = 13.8507(10)$ ,  $c = 27.326(3)$  Å,  $\beta = 98.033(9)^\circ$ ,  $U = 17352(3)$  Å<sup>3</sup>,  $Z = 8$ ,  $D_c = 1.570$  Mg m<sup>-3</sup>,  $\mu(\text{Mo-K}\alpha) = 0.819$  mm<sup>-1</sup>,  $T = 173$  K. Total 106200 reflections, 18018 unique,  $R_{\text{int}} = 0.1355$ . Refinement of 14202 reflections (1299 parameters) with  $I > 2\sigma(I)$  converged at final  $R1 = 0.0648$  ( $R1$  all data = 0.0844),  $wR2 = 0.1546$  ( $wR2$  all data = 0.1671),  $\text{gof} = 1.060$ .

**2(2)·C<sub>60</sub>·1,2-Cl<sub>2</sub>C<sub>6</sub>H<sub>4</sub>·0.25H<sub>2</sub>O:** C<sub>162</sub>H<sub>94.50</sub>Cl<sub>2</sub>N<sub>6</sub>Ni<sub>6</sub>O<sub>12.25</sub>S<sub>6</sub>,  $M = 2936.40$ , black plate, triclinic, space group  $P-1$ ,  $a = 13.2134(15)$ ,  $b = 16.8326(17)$ ,  $c = 27.248(3)$  Å,  $\alpha = 92.936(2)$ ,  $\beta = 94.129(2)$ ,  $\gamma = 94.028(2)^\circ$ ,  $U = 6020.0(11)$  Å<sup>3</sup>,  $Z = 2$ ,  $D_c = 1.620$  Mg m<sup>-3</sup>,  $\mu(\text{Mo-K}\alpha) = 1.143$  mm<sup>-1</sup>,  $T = 123$  K. Total 107293 reflections, 30466 unique,  $R_{\text{int}} = 0.0824$ . Refinement of 17799 reflections (1846 parameters) with  $I > 2\sigma(I)$  converged at final  $R1 = 0.0560$  ( $R1$  all data = 0.1285),  $wR2 = 0.1463$  ( $wR2$  all data = 0.2119),  $\text{gof} = 1.064$ .

**2(3)·C<sub>60</sub>·CH<sub>2</sub>Cl<sub>2</sub>:** C<sub>127</sub>H<sub>80</sub>Cl<sub>2</sub>N<sub>6</sub>Ni<sub>6</sub>O<sub>12</sub>S<sub>6</sub>,  $M = 2497.76$ , black block, trigonal, space group  $P31c$ ,  $a = b = 18.551(3)$ ,  $c = 16.155(3)$  Å,  $U = 4814.5(13)$  Å<sup>3</sup>,  $Z = 2$ ,  $D_c = 1.723$  Mg m<sup>-3</sup>,  $\mu(\text{Mo-K}\alpha) = 1.412$  mm<sup>-1</sup>,  $T = 173$  K. Total 81838 reflections, 7362 unique,  $R_{\text{int}} = 0.0714$ .



Refinement of 7006 reflections (484 parameters) with  $I > 2\sigma(I)$  converged at final  $R1 = 0.0444$  ( $R1$  all data = 0.0471),  $wR2 = 0.1127$  ( $wR2$  all data = 0.1145),  $\text{gof} = 1.106$ .

**Pulsed-field gradient spin-echo (PGSE) spectroscopy:** The experimental details are similar to those detailed previously by us.<sup>7</sup>

**NMR titration of **1** with  $C_{60}$  in 1,2- $Cl_2C_6D_4$ :** Compound **1** (19.8 mg,  $1.68 \times 10^{-2}$  mmol) was dissolved in 1,2- $Cl_2C_6D_4$  (4.0 mL). The sample was split into 10 equal portions (400  $\mu\text{L}$ ) in 10 NMR tubes. To each was added, respectively, 10, 20, 30, 40, 50, 60, 70, 80, 90 and 100  $\mu\text{L}$  of  $2.54 \times 10^{-2}$  mol  $\text{dm}^{-3}$  solution of  $C_{60}$  in 1,2- $Cl_2C_6D_4$  (1.0 mL) then neat 1,2- $Cl_2C_6D_4$  was added to each tube to give a total volume of 500  $\mu\text{L}$  for each sample. TMS was added to each tube as an internal standard. The  $^1\text{H}$  NMR spectrum was recorded for each sample. The sample containing 100  $\mu\text{L}$  of  $2.54 \times 10^{-2}$  mol  $\text{dm}^{-3}$  solution of  $C_{60}$  (corresponding to 1 : 1 molar equivalents of **1** :  $C_{60}$ ) was then taken, and to it was added 0.75 equivalents  $C_{60}$  (0.92 mg) and (after 15 minutes sonication) the  $^1\text{H}$  NMR spectrum was recorded. This last procedure was repeated to give solutions with 3.0, 4.5, 6.0, 7.5 equivalents of  $C_{60}$  with respect to **1**.

$K_d$  was obtained by non-linear two-parameter fitting of the induced changes in chemical shifts  $\Delta\delta_{obs}$  to the following equation:

$$\Delta\delta_{obs} = (\delta_{cplx} - \delta_{free}) \times \frac{1}{2} [(k + 1 + x_{C_{60}}) - \{(k + 1 + x_{C_{60}})^2 - 4x_{C_{60}}\}^{1/2}]$$

where:  $x_{C_{60}}$  is the molar ratio of fullerene to **1**

$k$  is  $K_d / [\mathbf{1}]$

$\delta_{free}$  is the chemical shift of pure **1** in the absence of  $C_{60}$

$\delta_{cplx}$  is the hypothetical chemical shift of the 1:1 host–guest complex

**Table S1: Titration data: chemical shift differences for each proton, labeled as in Scheme S1.**

|                          | H $\Delta\delta$ / ppm    |                           |                           |                           |                           |                           |                           |                           |                           |                           |                           |
|--------------------------|---------------------------|---------------------------|---------------------------|---------------------------|---------------------------|---------------------------|---------------------------|---------------------------|---------------------------|---------------------------|---------------------------|
|                          | H <sup>CH=N</sup>         | H <sup>A4</sup>           | H <sup>A5</sup>           | H <sup>A6</sup>           | H <sup>B1</sup>           | H <sup>B3</sup>           | H <sup>B4</sup>           | H <sup>B5</sup>           | H <sup>B6</sup>           | H <sup>B7</sup>           | H <sup>B8</sup>           |
| Equiv of C <sub>60</sub> |                           |                           |                           |                           |                           |                           |                           |                           |                           |                           |                           |
| 0                        | 0<br>( $\delta$ 6.29 ppm) | 0<br>( $\delta$ 6.71 ppm) | 0<br>( $\delta$ 6.48 ppm) | 0<br>( $\delta$ 6.43 ppm) | 0<br>( $\delta$ 7.67 ppm) | 0<br>( $\delta$ 7.37 ppm) | 0<br>( $\delta$ 7.74 ppm) | 0<br>( $\delta$ 7.76 ppm) | 0<br>( $\delta$ 7.45 ppm) | 0<br>( $\delta$ 7.48 ppm) | 0<br>( $\delta$ 7.77 ppm) |
| 0.15                     | -0.031                    | 0.002                     | 0.005                     | -0.007                    | 0.009                     | 0.007                     | 0.005                     | 0.006                     | 0.006                     | 0.009                     | 0.007                     |
| 0.30                     | -0.056                    | 0.003                     | 0.008                     | -0.012                    | 0.016                     | 0.011                     | 0.008                     | 0.011                     | 0.009                     | 0.015                     | 0.012                     |
| 0.45                     | -0.078                    | 0.004                     | 0.011                     | -0.018                    | 0.023                     | 0.014                     | 0.013                     | 0.015                     | 0.012                     | 0.021                     | 0.016                     |
| 0.60                     | -0.100                    | 0.005                     | 0.015                     | -0.022                    | 0.028                     | 0.020                     | 0.016                     | 0.020                     | 0.016                     | 0.028                     | 0.021                     |
| 0.75                     | -0.119                    | 0.006                     | 0.018                     | -0.026                    | 0.033                     | 0.023                     | 0.019                     | 0.023                     | 0.019                     | 0.033                     | 0.025                     |
| 0.90                     | -0.130                    | 0.006                     | 0.019                     | -0.029                    | 0.038                     | 0.024                     | 0.020                     | 0.024                     | 0.021                     | 0.036                     | 0.030                     |
| 1.05                     | -0.144                    | 0.007                     | 0.021                     | -0.033                    | 0.042                     | 0.027                     | 0.022                     | 0.027                     | 0.023                     | 0.041                     | 0.034                     |
| 1.20                     | -0.155                    | 0.007                     | 0.023                     | -0.034                    | 0.044                     | 0.029                     | 0.025                     | 0.027                     | 0.024                     | 0.043                     | 0.037                     |
| 1.36                     | -0.166                    | 0.007                     | 0.025                     | -0.038                    | 0.047                     | 0.032                     | 0.026                     | 0.029                     | 0.026                     | 0.047                     | 0.040                     |
| 1.50                     | -0.174                    | 0.008                     | 0.026                     | -0.040                    | 0.050                     | 0.033                     | 0.027                     | 0.030                     | 0.028                     | 0.049                     | 0.043                     |
| 2.27                     | -0.205                    | 0.010                     | 0.031                     | -0.046                    | 0.060                     | 0.040                     | 0.034                     | 0.035                     | 0.033                     | 0.059                     | 0.052                     |
| 3.03                     | -0.222                    | 0.010                     | 0.034                     | -0.050                    | 0.065                     | 0.043                     | 0.037                     | 0.036                     | 0.035                     | 0.064                     | 0.057                     |
| 4.54                     | -0.257                    | 0.012                     | 0.039                     | -0.058                    | 0.076                     | 0.051                     | 0.043                     | 0.042                     | 0.041                     | 0.074                     | 0.068                     |
| 6.05                     | -0.268                    | 0.013                     | 0.042                     | -0.060                    | 0.081                     | 0.055                     | 0.046                     | 0.044                     | 0.044                     | 0.079                     | 0.073                     |
| 7.56                     | -0.278                    | 0.013                     | 0.043                     | -0.062                    | 0.085                     | 0.057                     | 0.048                     | 0.046                     | 0.045                     | 0.082                     | 0.076                     |

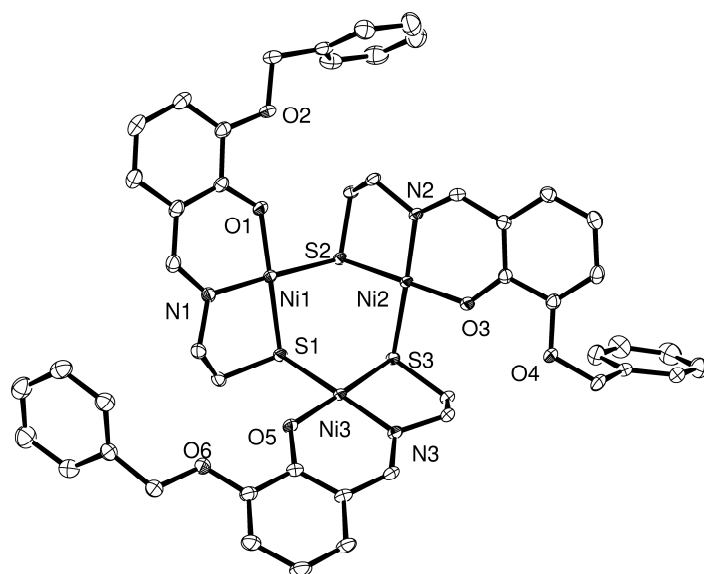

Fig. S1 Structure of **2** in 2·CH<sub>2</sub>Cl<sub>2</sub> with ellipsoids plotted at the 40% probability level; H atoms omitted.

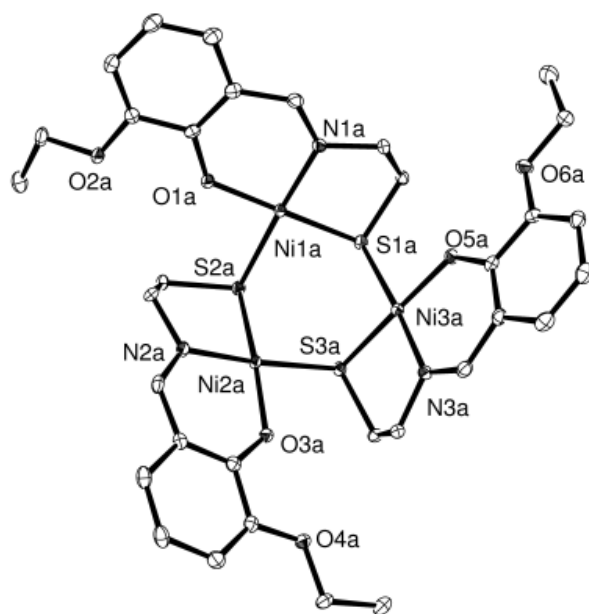

Fig. S2 Structure of one of the two independent molecules of **3** in 2(**3**)·CH<sub>2</sub>Cl<sub>2</sub> with ellipsoids plotted at the 40% probability level; H atoms omitted.

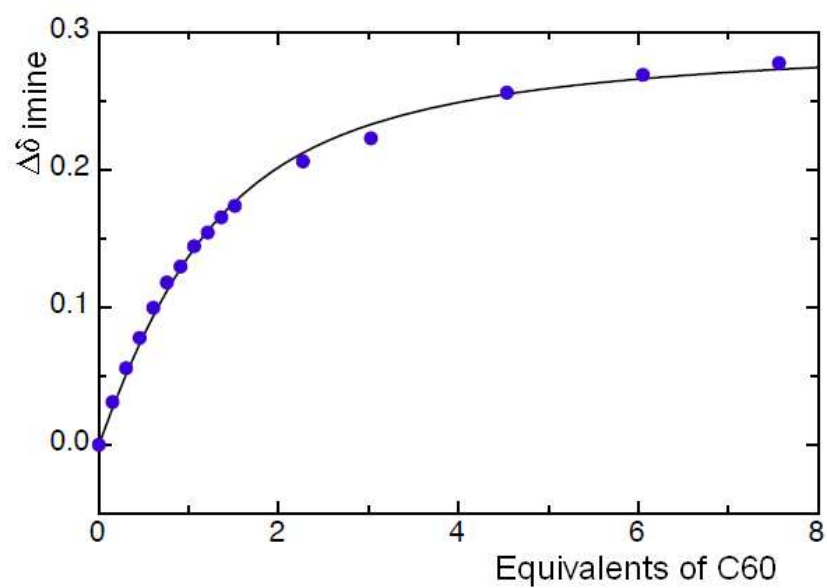

Fig. S3 Titration curve of  $\Delta\delta_{\text{imine}}$  against equivalents of  $\text{C}_{60}$  added to one equivalent of **1**.

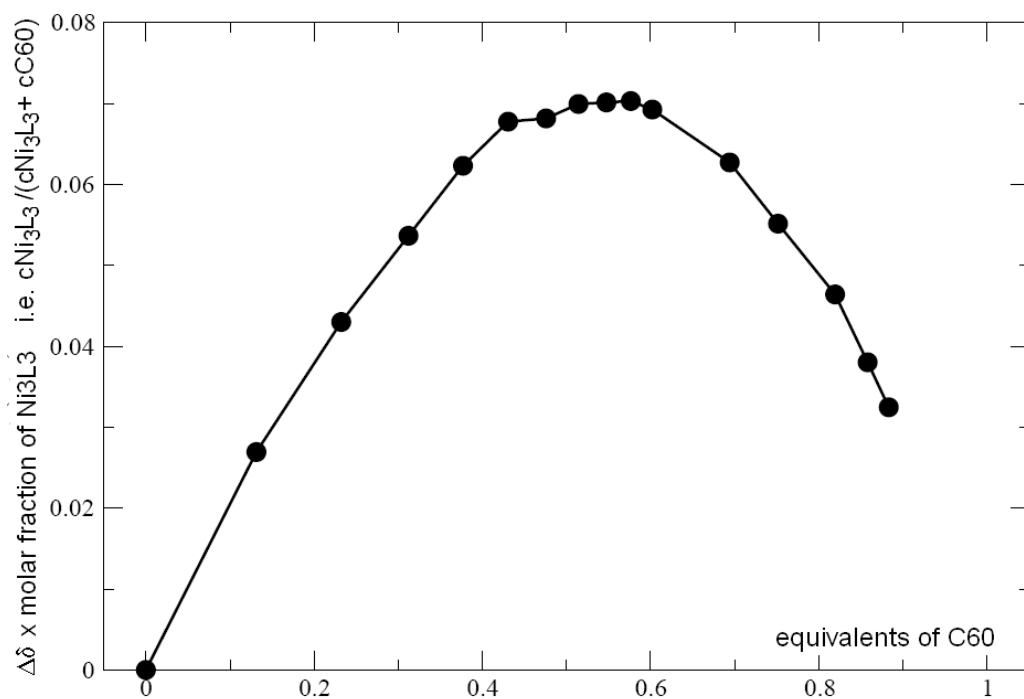

Fig. S4 Job's plot for the formation of host-guest complex between **1** and  $\text{C}_{60}$  in  $1,2\text{-Cl}_2\text{C}_6\text{D}_4$ .

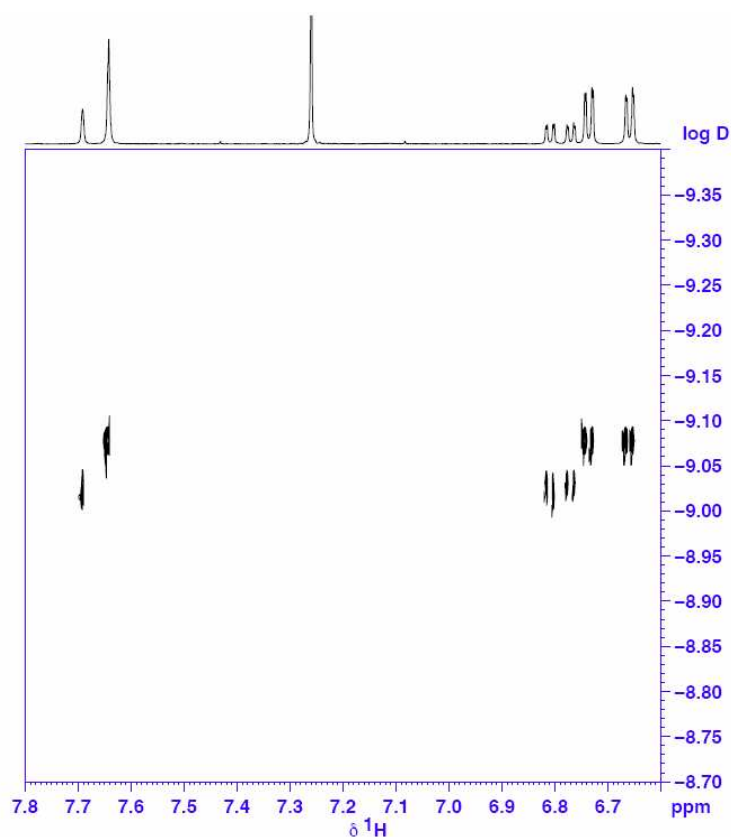

Fig. S5  $^1\text{H}$  DOSY-type plot (600 MHz,  $\text{CDCl}_3$ ) of the two solution components of **3**.

- 
- [1] Stoe & Cie, IPDS software v 1.26, Stoe & Cie, Darmstadt, Germany, 1996.
  - [2] Bruker Analytical X-ray Systems, Inc. (2006) APEX2, version 2 User Manual, M86-E01078, Madison, WI.
  - [3] G. M. Sheldrick, *Acta Crystallogr., Sect. A* **2008**, *64*, 112.
  - [4] L. J. Farrugia, *J. Appl. Cryst.* **1997**, *30*, 565.
  - [5] I. J. Bruno, J. C. Cole, P. R. Edgington, M. K. Kessler, C. F. Macrae, P. McCabe, J. Pearson, R. Taylor, *Acta Crystallogr., Sect. B* **2002**, *58*, 389.
  - [6] C. F. Macrae, I. J. Bruno, J. A. Chisholm, P. R. Edgington, P. McCabe, E. Pidcock, L. Rodriguez-Monge, R. Taylor, J. van de Streek, P. A. Wood, *J. Appl. Cryst.* **2008**, *41*, 466.
  - [7] See for example: E. C. Constable, G. Zhang, C. E. Housecroft, J. A. Zampese, *CrystEngComm* 2010, **12**, 3724-3732.
